# Supplementary material for: Global Disease Burden of Asthma Attributable to High BMI: A Systematic Analysis from 1990–2021
Source: Research Square preprint supplement (doi:10.21203/rs.3.rs-6848057/v1), 2025-07-11
Supplement: Supplementary file 1 [file 20f0cc71b02e61b5095e25fc.docx]

Supplementary Table 1. ASMRs for asthma attributable to high BMI in 204 countries and territories in 1990 and 2021, and EAPCs from 1990 to 2021.

| Deaths | 1990 | 2021 | 1990-2021 |
| --- | --- | --- | --- |
| location | ASMR (per 100,000)  No. (95% UI)) | ASMR (per 100,000)  No. (95% UI)) | EAPCs  No. (95% CI)) |
| Afghanistan | 6.896(2.863-12.473) | 5.070(2.048-9.918) | -1.342(-1.591, -1.092) |
| Albania | 3.014(1.343-4.731) | 0.984(0.418-1.730) | -3.954(-4.405, -3.500) |
| Algeria | 3.151(1.284-5.400) | 2.314(1.030-3.738) | -0.856(-0.917, -0.794) |
| American Samoa | 5.823(2.684-9.178) | 3.110(1.513-4.713) | -2.385(-2.600, -2.171) |
| Andorra | 0.414(0.172-0.708) | 0.141(0.060-0.248) | -3.375(-3.721, -3.029) |
| Angola | 1.854(0.740-4.137) | 1.600(0.594-3.113) | -0.825(-0.951, -0.699) |
| Antigua and Barbuda | 0.612(0.273-0.968) | 0.604(0.279-0.940) | -0.570(-1.008, -0.130) |
| Argentina | 0.517(0.236-0.828) | 0.229(0.107-0.349) | -3.016(-3.462, -2.568) |
| Armenia | 0.300(0.129-0.471) | 0.104(0.045-0.162) | -3.495(-3.852, -3.137) |
| Australia | 0.918(0.400-1.456) | 0.312(0.153-0.469) | -3.525(-4.251, -2.793) |
| Austria | 0.742(0.332-1.151) | 0.133(0.060-0.207) | -6.125(-6.610, -5.637) |
| Azerbaijan | 2.244(0.980-3.849) | 1.017(0.465-1.716) | -3.056(-3.276, -2.836) |
| Bahrain | 4.227(1.957-6.842) | 2.159(0.974-3.598) | -2.873(-3.347, -2.397) |
| Bangladesh | 1.143(0.481-2.084) | 0.932(0.361-1.844) | -0.580(-0.731, -0.428) |
| Barbados | 0.925(0.409-1.458) | 0.736(0.361-1.209) | -1.055(-1.494, -0.614) |
| Belarus | 0.744(0.317-1.212) | 0.074(0.033-0.119) | -8.906(-9.690, -8.115) |
| Belgium | 0.619(0.271-0.975) | 0.147(0.066-0.227) | -5.232(-5.622, -4.840) |
| Belize | 0.746(0.344-1.199) | 0.741(0.354-1.129) | -0.730(-1.385, -0.071) |
| Benin | 2.763(1.184-4.801) | 1.978(0.826-3.838) | -0.970(-1.220, -0.720) |
| Bermuda | 0.738(0.316-1.155) | 0.304(0.153-0.463) | -3.566(-4.119, -3.010) |
| Bhutan | 2.925(1.123-5.538) | 2.148(0.805-4.528) | -1.195(-1.307, -1.083) |
| Bolivia | 0.788(0.368-1.297) | 0.389(0.176-0.634) | -2.341(-2.427, -2.255) |
| Bosnia and Herzegovina | 0.570(0.228-1.036) | 0.252(0.118-0.409) | -3.209(-3.531, -2.886) |
| Botswana | 4.134(1.518-8.428) | 3.279(1.369-5.861) | -0.582(-0.834, -0.329) |
| Brazil | 0.529(0.243-0.847) | 0.287(0.128-0.447) | -2.603(-2.964, -2.241) |
| Brunei | 1.678(0.740-2.722) | 0.865(0.391-1.426) | -1.807(-2.017, -1.596) |
| Bulgaria | 0.662(0.291-1.051) | 0.099(0.042-0.155) | -7.187(-7.731, -6.639) |
| Burkina Faso | 0.948(0.460-1.619) | 0.788(0.357-1.312) | -0.611(-0.806, -0.416) |
| Burundi | 1.270(0.534-2.287) | 0.955(0.342-2.035) | -1.387(-1.666, -1.108) |
| Cambodia | 1.028(0.449-1.677) | 0.946(0.440-1.673) | -0.385(-0.445, -0.324) |
| Cameroon | 4.100(1.826-6.942) | 2.949(1.297-5.171) | -0.945(-1.035, -0.856) |
| Canada | 0.365(0.165-0.565) | 0.126(0.059-0.193) | -3.882(-4.341, -3.420) |
| Cape Verde | 2.219(0.881-3.866) | 1.160(0.485-2.093) | -1.979(-2.632, -1.322) |
| Central African Republic | 2.409(0.890-6.166) | 3.246(1.076-9.489) | 0.876(0.801, 0.951) |
| Chad | 2.025(0.818-3.529) | 1.899(0.754-3.435) | -0.147(-0.223, -0.070) |
| Chile | 0.699(0.317-1.093) | 0.283(0.129-0.437) | -2.833(-3.003, -2.661) |
| China | 0.470(0.194-0.837) | 0.237(0.106-0.390) | -2.523(-2.752, -2.292) |
| Colombia | 0.709(0.319-1.101) | 0.111(0.051-0.177) | -7.037(-7.459, -6.613) |
| Comoros | 1.762(0.689-3.249) | 1.642(0.649-3.128) | -0.540(-0.830, -0.250) |
| Congo | 2.979(1.047-6.833) | 2.421(0.999-4.667) | -1.012(-1.201, -0.822) |
| Cook Islands | 3.603(1.570-6.055) | 1.569(0.723-2.620) | -2.908(-3.078, -2.738) |
| Costa Rica | 0.598(0.283-0.947) | 0.221(0.102-0.348) | -4.136(-4.819, -3.448) |
| Cote d'Ivoire | 2.719(1.169-4.637) | 2.062(0.864-3.631) | -0.758(-0.849, -0.666) |
| Croatia | 1.159(0.516-1.862) | 0.219(0.091-0.349) | -6.386(-7.148, -5.618) |
| Cuba | 0.537(0.232-0.824) | 0.446(0.203-0.700) | -1.052(-1.431, -0.670) |
| Cyprus | 1.341(0.560-2.263) | 0.507(0.227-0.833) | -3.532(-3.801, -3.263) |
| Czech Republic | 0.595(0.271-0.913) | 0.159(0.070-0.245) | -4.445(-5.230, -3.653) |
| Democratic Republic of the Congo | 1.960(0.665-5.411) | 2.911(0.938-8.771) | 1.322(1.266, 1.377) |
| Denmark | 0.637(0.286-1.017) | 0.177(0.080-0.281) | -5.218(-5.764, -4.669) |
| Djibouti | 0.797(0.338-1.425) | 0.661(0.249-1.241) | -0.811(-0.910, -0.713) |
| Dominica | 1.486(0.652-2.323) | 1.488(0.704-2.330) | -0.199(-0.318, -0.081) |
| Dominican Republic | 1.374(0.643-2.204) | 0.864(0.376-1.523) | -1.174(-1.382, -0.966) |
| Ecuador | 0.730(0.326-1.144) | 0.109(0.048-0.172) | -5.520(-5.999, -5.038) |
| Egypt | 5.518(2.316-9.246) | 2.397(1.129-3.709) | -2.828(-3.068, -2.587) |
| El Salvador | 1.658(0.660-2.680) | 0.714(0.329-1.183) | -3.399(-3.695, -3.102) |
| Equatorial Guinea | 3.232(1.199-7.049) | 1.806(0.716-3.674) | -2.481(-2.758, -2.203) |
| Eritrea | 0.959(0.408-1.648) | 1.020(0.405-1.803) | 0.209(0.095, 0.324) |
| Estonia | 1.190(0.522-1.874) | 0.169(0.073-0.268) | -6.908(-7.245, -6.570) |
| Ethiopia | 1.108(0.476-1.858) | 0.580(0.238-0.999) | -2.535(-2.697, -2.372) |
| Federated States of Micronesia | 8.849(3.635-16.073) | 5.970(2.579-9.894) | -1.424(-1.500, -1.347) |
| Fiji | 17.447(7.744-28.487) | 12.844(5.956-20.042) | -1.639(-2.015, -1.261) |
| Finland | 0.464(0.197-0.746) | 0.177(0.077-0.282) | -3.519(-3.749, -3.288) |
| France | 0.495(0.219-0.770) | 0.154(0.067-0.246) | -4.542(-4.953, -4.130) |
| Gabon | 3.245(1.142-6.383) | 2.273(0.905-4.602) | -1.310(-1.436, -1.183) |
| Georgia | 1.996(0.836-3.156) | 0.419(0.181-0.679) | -4.411(-5.457, -3.354) |
| Germany | 1.256(0.545-1.981) | 0.158(0.069-0.247) | -7.606(-8.200, -7.008) |
| Ghana | 1.182(0.502-2.039) | 1.504(0.604-2.568) | 0.999(0.855, 1.143) |
| Greece | 0.169(0.077-0.264) | 0.051(0.025-0.078) | -3.936(-4.387, -3.482) |
| Greenland | 1.487(0.625-2.472) | 0.425(0.191-0.663) | -4.665(-4.940, -4.389) |
| Grenada | 0.729(0.328-1.152) | 0.669(0.300-1.052) | -0.471(-0.855, -0.086) |
| Guam | 2.040(0.906-3.261) | 0.543(0.253-0.860) | -4.004(-4.285, -3.723) |
| Guatemala | 2.415(1.087-3.826) | 0.529(0.246-0.841) | -5.438(-5.714, -5.161) |
| Guinea | 2.289(0.992-3.914) | 2.117(0.860-4.012) | 0.046(-0.145, 0.238) |
| Guinea-Bissau | 3.546(1.513-6.320) | 3.023(1.287-5.592) | -0.284(-0.489, -0.079) |
| Guyana | 1.330(0.554-2.142) | 0.959(0.448-1.548) | -1.259(-1.533, -0.985) |
| Haiti | 1.311(0.455-3.043) | 1.332(0.429-3.579) | 0.191(0.122, 0.261) |
| Honduras | 1.614(0.683-2.852) | 1.192(0.525-2.083) | -1.018(-1.161, -0.874) |
| Hungary | 0.631(0.276-0.993) | 0.146(0.067-0.229) | -5.361(-5.788, -4.933) |
| Iceland | 0.528(0.242-0.840) | 0.173(0.079-0.271) | -4.209(-4.656, -3.760) |
| India | 1.442(0.562-2.590) | 1.915(0.771-3.399) | 1.241(1.084, 1.399) |
| Indonesia | 1.118(0.516-1.835) | 1.444(0.652-2.374) | 0.965(0.754, 1.177) |
| Iran | 2.178(0.854-3.430) | 1.406(0.612-2.252) | -1.654(-1.852, -1.457) |
| Iraq | 2.125(0.873-3.455) | 1.383(0.582-2.223) | -1.989(-2.199, -1.778) |
| Ireland | 0.748(0.341-1.169) | 0.165(0.074-0.257) | -5.175(-5.648, -4.699) |
| Israel | 1.118(0.497-1.767) | 0.260(0.117-0.402) | -5.056(-5.575, -4.533) |
| Italy | 0.425(0.189-0.677) | 0.065(0.028-0.103) | -6.899(-7.665, -6.126) |
| Jamaica | 0.612(0.278-0.979) | 0.632(0.301-1.031) | -0.350(-0.953, 0.256) |
| Japan | 0.426(0.193-0.674) | 0.048(0.020-0.076) | -8.199(-8.678, -7.718) |
| Jordan | 2.142(0.953-3.419) | 0.828(0.378-1.285) | -3.899(-4.388, -3.407) |
| Kazakhstan | 2.833(1.230-4.749) | 2.439(1.130-3.989) | -1.301(-1.957, -0.640) |
| Kenya | 1.033(0.315-3.207) | 1.578(0.490-5.238) | 1.744(1.512, 1.976) |
| Kiribati | 8.645(3.029-20.875) | 8.330(3.392-15.383) | -0.205(-0.317, -0.093) |
| Kuwait | 1.923(0.868-2.916) | 0.494(0.236-0.775) | -4.741(-5.724, -3.748) |
| Kyrgyzstan | 1.460(0.622-2.379) | 0.381(0.170-0.599) | -5.476(-6.030, -4.918) |
| Laos | 2.131(0.897-3.789) | 1.687(0.637-3.273) | -0.914(-1.022, -0.807) |
| Latvia | 1.401(0.638-2.154) | 0.210(0.097-0.321) | -6.821(-7.220, -6.420) |
| Lebanon | 1.305(0.521-2.306) | 0.720(0.334-1.152) | -1.776(-1.902, -1.649) |
| Lesotho | 3.962(1.479-8.023) | 5.839(2.206-10.366) | 1.971(1.523, 2.420) |
| Liberia | 3.259(1.360-5.510) | 2.560(1.070-4.762) | -0.786(-1.073, -0.497) |
| Libya | 3.096(1.293-5.210) | 3.134(1.342-5.277) | 0.214(0.046, 0.383) |
| Lithuania | 0.826(0.369-1.301) | 0.132(0.059-0.207) | -6.654(-6.998, -6.309) |
| Luxembourg | 0.877(0.388-1.348) | 0.224(0.098-0.351) | -4.887(-5.318, -4.454) |
| Macedonia | 1.914(0.789-3.118) | 0.682(0.287-1.164) | -4.342(-4.722, -3.961) |
| Madagascar | 1.691(0.715-2.952) | 2.238(0.875-4.368) | 0.743(0.669, 0.817) |
| Malawi | 1.238(0.540-2.116) | 1.473(0.582-2.727) | 0.299(0.092, 0.506) |
| Malaysia | 1.470(0.621-2.260) | 0.771(0.323-1.275) | -3.207(-3.722, -2.689) |
| Maldives | 1.459(0.609-2.563) | 0.538(0.233-0.906) | -3.692(-3.911, -3.472) |
| Mali | 3.143(1.278-5.375) | 2.717(1.121-5.262) | -0.399(-0.596, -0.202) |
| Malta | 0.455(0.202-0.708) | 0.140(0.064-0.225) | -4.518(-4.886, -4.147) |
| Marshall Islands | 7.880(3.269-12.973) | 6.050(2.447-10.160) | -0.912(-1.027, -0.797) |
| Mauritania | 3.785(1.649-6.406) | 1.960(0.827-3.291) | -2.054(-2.379, -1.728) |
| Mauritius | 4.767(2.127-7.546) | 1.382(0.625-2.166) | -4.287(-4.632, -3.940) |
| Mexico | 1.544(0.699-2.426) | 0.295(0.139-0.449) | -5.695(-5.891, -5.499) |
| Moldova | 1.057(0.458-1.649) | 0.125(0.059-0.188) | -7.866(-8.350, -7.379) |
| Monaco | 0.048(0.021-0.080) | 0.041(0.019-0.067) | -0.550(-0.654, -0.446) |
| Mongolia | 2.157(0.813-3.852) | 0.641(0.281-1.013) | -4.880(-5.272, -4.487) |
| Montenegro | 0.146(0.063-0.246) | 0.110(0.048-0.174) | -1.447(-1.861, -1.031) |
| Morocco | 3.086(1.241-5.265) | 2.666(1.117-4.485) | -0.457(-0.498, -0.415) |
| Mozambique | 0.925(0.421-1.603) | 1.312(0.518-2.527) | 1.526(1.376, 1.676) |
| Myanmar | 3.217(1.425-5.485) | 2.499(1.083-4.471) | -1.120(-1.257, -0.983) |
| Namibia | 4.259(1.661-8.658) | 4.180(1.834-7.437) | -0.245(-0.571, 0.081) |
| Nauru | 7.757(3.122-12.879) | 7.371(2.935-13.808) | -0.236(-0.657, 0.187) |
| Nepal | 2.155(0.854-3.962) | 2.295(0.926-4.414) | 0.460(0.177, 0.745) |
| Netherlands | 0.246(0.113-0.386) | 0.101(0.045-0.159) | -2.626(-3.416, -1.829) |
| New Zealand | 1.020(0.462-1.568) | 0.454(0.219-0.682) | -3.067(-4.077, -2.048) |
| Nicaragua | 1.046(0.455-1.679) | 0.491(0.217-0.790) | -2.852(-3.186, -2.517) |
| Niger | 2.137(0.899-3.782) | 1.538(0.591-3.158) | -0.977(-1.270, -0.684) |
| Nigeria | 1.542(0.691-2.539) | 1.444(0.660-2.371) | -0.278(-0.361, -0.195) |
| Niue | 4.899(2.105-8.007) | 3.633(1.647-5.992) | -1.335(-1.455, -1.215) |
| North Korea | 0.761(0.273-1.736) | 0.811(0.298-1.791) | 0.263(0.214, 0.312) |
| Northern Mariana Islands | 3.919(1.674-6.621) | 2.179(1.041-3.411) | -2.311(-2.562, -2.059) |
| Norway | 1.061(0.462-1.685) | 0.185(0.082-0.291) | -6.410(-7.011, -5.804) |
| Oman | 2.074(0.837-3.555) | 1.400(0.606-2.372) | -0.770(-1.019, -0.520) |
| Pakistan | 1.714(0.657-3.391) | 2.095(0.837-4.706) | 0.538(0.207, 0.870) |
| Palau | 8.193(3.767-13.429) | 6.633(3.035-10.276) | -0.570(-0.639, -0.500) |
| Palestine | 2.550(1.052-4.279) | 1.364(0.632-2.102) | -2.197(-2.625, -1.768) |
| Panama | 0.791(0.357-1.259) | 0.329(0.154-0.524) | -3.387(-3.898, -2.873) |
| Papua New Guinea | 5.819(2.144-10.589) | 5.850(2.359-12.048) | 0.049(-0.010, 0.108) |
| Paraguay | 0.463(0.207-0.753) | 0.415(0.191-0.682) | -0.313(-0.459, -0.167) |
| Peru | 0.431(0.207-0.690) | 0.175(0.072-0.308) | -3.235(-3.487, -2.982) |
| Philippines | 1.931(0.780-3.112) | 1.849(0.810-3.029) | -0.072(-0.333, 0.190) |
| Poland | 1.719(0.778-2.681) | 0.228(0.106-0.358) | -7.341(-8.157, -6.518) |
| Portugal | 0.765(0.343-1.195) | 0.163(0.073-0.257) | -5.200(-5.862, -4.533) |
| Puerto Rico | 1.226(0.566-1.887) | 0.514(0.245-0.802) | -3.941(-4.573, -3.306) |
| Qatar | 3.132(1.260-5.195) | 0.972(0.438-1.557) | -4.559(-5.418, -3.692) |
| Romania | 1.117(0.483-1.784) | 0.170(0.076-0.267) | -6.326(-6.690, -5.960) |
| Russian Federation | 1.242(0.551-1.921) | 0.174(0.079-0.263) | -7.706(-8.180, -7.231) |
| Rwanda | 1.867(0.833-3.320) | 1.148(0.430-2.655) | -2.571(-2.960, -2.180) |
| Saint Kitts and Nevis | 0.907(0.386-1.439) | 0.511(0.237-0.810) | -2.080(-2.592, -1.565) |
| Saint Lucia | 1.437(0.636-2.254) | 0.823(0.385-1.307) | -2.511(-2.936, -2.084) |
| Saint Vincent and the Grenadines | 0.901(0.407-1.421) | 0.703(0.330-1.120) | -1.012(-1.562, -0.458) |
| Samoa | 7.265(2.892-15.325) | 5.174(2.378-8.826) | -1.081(-1.162, -1.000) |
| San Marino | 0.182(0.081-0.293) | 0.086(0.037-0.152) | -1.521(-1.912, -1.128) |
| Sao Tome and Principe | 5.651(2.435-9.652) | 5.031(2.137-8.755) | -0.469(-0.594, -0.344) |
| Saudi Arabia | 3.849(1.583-6.405) | 2.570(1.250-4.104) | -1.484(-1.636, -1.333) |
| Senegal | 2.480(1.036-4.085) | 1.951(0.839-3.420) | -0.481(-0.904, -0.057) |
| Serbia | 1.524(0.630-2.666) | 0.571(0.256-0.914) | -4.028(-4.432, -3.621) |
| Seychelles | 1.883(0.828-2.958) | 1.439(0.631-2.346) | -0.865(-0.997, -0.732) |
| Sierra Leone | 2.094(0.885-3.640) | 1.857(0.767-3.612) | -0.106(-0.300, 0.087) |
| Singapore | 0.651(0.301-1.032) | 0.057(0.025-0.092) | -8.765(-9.243, -8.285) |
| Slovakia | 0.526(0.229-0.813) | 0.148(0.066-0.233) | -4.629(-4.957, -4.300) |
| Slovenia | 0.660(0.294-0.999) | 0.104(0.047-0.162) | -6.788(-7.431, -6.141) |
| Solomon Islands | 3.831(1.583-6.918) | 3.727(1.580-6.673) | -0.017(-0.079, 0.046) |
| Somalia | 1.825(0.725-3.322) | 1.852(0.699-3.488) | -0.051(-0.147, 0.044) |
| South Africa | 3.862(1.612-6.520) | 3.559(1.637-5.458) | -0.482(-1.103, 0.144) |
| South Korea | 3.758(1.495-6.374) | 0.401(0.166-0.703) | -8.556(-9.091, -8.019) |
| South Sudan | 1.078(0.454-1.921) | 1.034(0.421-1.979) | -0.359(-0.737, 0.022) |
| Spain | 0.547(0.246-0.860) | 0.246(0.109-0.380) | -2.536(-2.854, -2.218) |
| Sri Lanka | 2.158(0.875-3.528) | 1.226(0.487-2.245) | -1.852(-2.049, -1.655) |
| Sudan | 5.047(1.659-13.419) | 3.258(1.258-6.136) | -1.700(-1.803, -1.597) |
| Suriname | 0.699(0.307-1.126) | 0.542(0.240-0.878) | -1.114(-1.327, -0.900) |
| Swaziland | 6.948(2.550-13.838) | 6.770(2.634-12.025) | 0.310(-0.235, 0.857) |
| Sweden | 0.614(0.275-0.965) | 0.140(0.061-0.224) | -4.518(-5.094, -3.938) |
| Switzerland | 0.638(0.279-0.990) | 0.122(0.054-0.199) | -5.787(-6.344, -5.227) |
| Syria | 3.519(1.476-5.811) | 3.301(1.504-5.367) | -0.486(-0.663, -0.309) |
| Taiwan | 1.704(0.753-2.715) | 0.309(0.128-0.495) | -6.065(-6.522, -5.606) |
| Tajikistan | 3.087(1.279-5.514) | 1.688(0.716-2.905) | -2.215(-2.553, -1.875) |
| Tanzania | 1.226(0.492-2.131) | 1.325(0.498-2.739) | 0.148(0.086, 0.210) |
| Thailand | 1.012(0.430-1.671) | 0.656(0.292-1.096) | -1.964(-2.180, -1.747) |
| The Bahamas | 0.735(0.319-1.145) | 0.587(0.264-0.929) | -1.394(-1.718, -1.068) |
| The Gambia | 2.640(1.094-4.535) | 2.486(1.009-4.765) | -0.199(-0.454, 0.057) |
| Timor-Leste | 0.871(0.387-1.543) | 0.871(0.372-1.518) | 0.027(-0.224, 0.278) |
| Togo | 2.400(1.033-4.181) | 2.334(0.882-4.446) | 0.110(-0.046, 0.267) |
| Tokelau | 5.088(1.933-9.581) | 3.582(1.611-6.284) | -1.424(-1.532, -1.316) |
| Tonga | 4.311(1.874-7.327) | 3.719(1.811-6.135) | -0.369(-0.510, -0.228) |
| Trinidad and Tobago | 1.526(0.670-2.365) | 0.836(0.384-1.330) | -2.483(-2.819, -2.146) |
| Tunisia | 2.333(0.978-3.805) | 1.831(0.781-3.250) | -1.052(-1.164, -0.941) |
| Turkey | 1.861(0.762-3.090) | 1.008(0.452-1.640) | -1.889(-2.189, -1.589) |
| Turkmenistan | 1.717(0.705-2.937) | 0.401(0.158-0.712) | -5.755(-6.476, -5.028) |
| Tuvalu | 7.321(3.059-12.053) | 4.868(2.102-8.374) | -1.341(-1.410, -1.272) |
| Uganda | 1.151(0.467-2.211) | 1.149(0.405-2.780) | -0.565(-0.800, -0.330) |
| Ukraine | 0.308(0.132-0.493) | 0.050(0.021-0.082) | -7.516(-8.181, -6.846) |
| United Arab Emirates | 3.880(1.513-6.662) | 2.620(1.122-4.124) | 0.299(-0.361, 0.964) |
| United Kingdom | 0.637(0.288-0.991) | 0.355(0.162-0.546) | -1.700(-2.190, -1.209) |
| United States | 0.420(0.191-0.644) | 0.259(0.125-0.382) | -2.205(-2.538, -1.872) |
| Uruguay | 0.918(0.410-1.452) | 0.538(0.245-0.827) | -2.088(-2.389, -1.787) |
| Uzbekistan | 4.022(1.716-6.676) | 1.105(0.488-1.774) | -5.436(-6.370, -4.492) |
| Vanuatu | 5.323(1.866-12.398) | 5.165(1.906-12.073) | -0.288(-0.396, -0.179) |
| Venezuela | 0.799(0.357-1.257) | 0.371(0.178-0.591) | -3.325(-3.784, -2.863) |
| Vietnam | 0.571(0.238-1.022) | 0.583(0.231-1.010) | 0.270(0.157, 0.383) |
| Virgin Islands, U.S. | 1.209(0.538-1.868) | 0.562(0.249-0.982) | -2.328(-2.519, -2.136) |
| Yemen | 3.131(1.115-6.528) | 3.056(1.122-5.330) | -0.363(-0.570, -0.155) |
| Zambia | 1.296(0.574-2.164) | 1.667(0.671-3.101) | 0.632(0.469, 0.796) |
| Zimbabwe | 2.497(1.022-4.208) | 5.082(2.042-8.765) | 2.966(2.541, 3.393) |

Supplementary Table 2. ASDRs for asthma attributable to high BMI in 204 countries and territories in 1990 and 2021, and EAPCs from 1990 to 2021.

| DALYs | 1990 | 2021 | 1990-2021 |
| --- | --- | --- | --- |
| location | ASDR (per 100,000)  No. (95% UI)) | ASDR (per 100,000)  No. (95% UI)) | EAPCs  No. (95% CI)) |
| Afghanistan | 208.026(90.084-358.950) | 149.927(64.671-270.464) | -1.402(-1.627, -1.177) |
| Albania | 73.710(35.117-113.442) | 35.081(18.608-54.388) | -2.560(-2.770, -2.351) |
| Algeria | 77.978(34.651-123.989) | 65.079(33.538-101.753) | -0.655(-0.714, -0.596) |
| American Samoa | 163.672(80.453-244.634) | 89.382(48.382-129.843) | -2.286(-2.471, -2.101) |
| Andorra | 72.004(33.683-116.489) | 52.296(24.226-85.584) | -1.190(-1.364, -1.016) |
| Angola | 64.598(31.701-117.990) | 54.061(24.185-92.617) | -0.918(-1.052, -0.784) |
| Antigua and Barbuda | 43.713(22.995-66.571) | 52.384(29.287-77.429) | 0.428(0.307, 0.549) |
| Argentina | 69.451(32.546-111.029) | 59.572(28.234-93.300) | -0.787(-0.899, -0.674) |
| Armenia | 19.699(9.601-30.561) | 13.249(6.751-20.481) | -1.188(-1.497, -0.878) |
| Australia | 101.606(50.052-159.050) | 75.629(37.393-119.841) | -1.276(-1.521, -1.031) |
| Austria | 68.652(31.386-111.860) | 35.866(16.734-57.563) | -2.208(-2.376, -2.040) |
| Azerbaijan | 73.714(35.151-113.856) | 40.221(20.326-63.306) | -2.549(-2.750, -2.348) |
| Bahrain | 118.464(58.338-180.199) | 68.796(35.518-103.337) | -2.380(-2.706, -2.054) |
| Bangladesh | 35.182(15.446-61.050) | 30.206(12.501-54.520) | -0.320(-0.440, -0.201) |
| Barbados | 73.217(37.579-114.962) | 83.627(44.843-127.161) | 0.281(0.117, 0.445) |
| Belarus | 66.003(30.179-107.831) | 33.978(15.792-55.247) | -2.651(-2.859, -2.442) |
| Belgium | 68.863(31.599-113.496) | 37.087(17.191-60.480) | -2.089(-2.345, -1.832) |
| Belize | 57.577(30.171-87.778) | 68.006(35.810-101.112) | 0.177(-0.153, 0.507) |
| Benin | 91.441(43.495-151.824) | 65.941(30.034-115.113) | -1.014(-1.218, -0.810) |
| Bermuda | 56.492(29.802-84.747) | 57.399(31.984-88.058) | -0.116(-0.218, -0.014) |
| Bhutan | 88.124(36.456-158.705) | 58.445(25.338-114.178) | -1.573(-1.685, -1.461) |
| Bolivia | 49.552(29.218-76.439) | 30.463(17.925-45.306) | -1.704(-1.810, -1.599) |
| Bosnia and Herzegovina | 45.338(21.841-71.661) | 41.360(20.657-65.380) | -0.391(-0.448, -0.334) |
| Botswana | 115.751(47.518-226.134) | 96.119(42.538-161.148) | -0.520(-0.715, -0.325) |
| Brazil | 42.879(22.209-66.034) | 37.346(20.695-56.219) | -0.957(-1.161, -0.753) |
| Brunei | 61.611(29.024-95.968) | 45.990(21.027-72.016) | -0.887(-0.978, -0.796) |
| Bulgaria | 48.623(23.000-77.910) | 26.763(13.110-42.005) | -2.308(-2.471, -2.145) |
| Burkina Faso | 37.396(19.732-58.997) | 33.220(17.137-50.481) | -0.404(-0.558, -0.249) |
| Burundi | 49.069(25.300-80.795) | 36.365(17.013-64.925) | -1.375(-1.608, -1.143) |
| Cambodia | 30.316(13.692-48.308) | 27.170(12.724-46.515) | -0.484(-0.540, -0.429) |
| Cameroon | 116.622(55.435-193.278) | 85.902(39.912-143.274) | -0.904(-0.986, -0.822) |
| Canada | 62.446(30.070-98.335) | 48.247(25.056-75.342) | -0.537(-0.713, -0.361) |
| Cape Verde | 75.304(32.186-123.372) | 37.879(17.579-61.906) | -2.053(-2.594, -1.510) |
| Central African Republic | 78.664(33.611-159.638) | 105.122(44.090-254.438) | 0.839(0.774, 0.904) |
| Chad | 58.935(25.679-97.667) | 56.301(24.537-97.192) | -0.109(-0.176, -0.042) |
| Chile | 73.532(35.261-117.269) | 68.642(33.679-106.830) | -0.323(-0.474, -0.172) |
| China | 16.498(7.755-25.919) | 13.474(6.909-20.772) | -0.946(-1.165, -0.727) |
| Colombia | 39.541(19.955-61.136) | 22.945(12.070-35.647) | -2.006(-2.230, -1.781) |
| Comoros | 68.977(33.167-112.966) | 71.067(37.772-115.111) | -0.224(-0.446, -0.001) |
| Congo | 97.337(39.691-187.984) | 81.823(39.408-138.831) | -0.916(-1.113, -0.720) |
| Cook Islands | 111.155(57.046-174.014) | 54.252(29.316-79.139) | -2.339(-2.468, -2.210) |
| Costa Rica | 62.741(31.741-98.869) | 52.360(27.720-81.001) | -0.997(-1.207, -0.787) |
| Cote d'Ivoire | 84.492(38.385-138.180) | 69.031(31.847-114.469) | -0.570(-0.648, -0.492) |
| Croatia | 66.168(32.137-105.122) | 35.227(17.955-55.063) | -2.311(-2.575, -2.045) |
| Cuba | 57.874(28.949-88.830) | 62.368(34.304-93.766) | 0.015(-0.102, 0.131) |
| Cyprus | 75.571(33.732-124.937) | 70.290(31.914-115.415) | -0.292(-0.353, -0.231) |
| Czech Republic | 36.666(18.019-56.113) | 23.235(11.934-36.631) | -1.393(-1.627, -1.159) |
| Democratic Republic of the Congo | 56.046(22.372-128.433) | 80.872(30.994-203.614) | 1.203(1.150, 1.256) |
| Denmark | 60.648(29.074-96.421) | 38.271(18.079-61.662) | -1.708(-1.895, -1.520) |
| Djibouti | 33.854(18.318-53.676) | 30.223(14.787-48.654) | -0.618(-0.712, -0.525) |
| Dominica | 79.221(41.522-120.649) | 92.796(51.138-134.753) | 0.361(0.239, 0.484) |
| Dominican Republic | 55.314(29.694-83.091) | 47.639(25.296-72.245) | -0.212(-0.333, -0.090) |
| Ecuador | 37.824(21.743-55.408) | 22.206(12.047-33.824) | -1.617(-2.001, -1.232) |
| Egypt | 152.032(71.455-230.464) | 82.545(43.401-119.924) | -2.237(-2.447, -2.026) |
| El Salvador | 87.865(45.317-133.047) | 61.205(31.520-93.824) | -1.554(-1.716, -1.391) |
| Equatorial Guinea | 110.000(50.291-208.214) | 64.186(31.256-114.299) | -2.295(-2.526, -2.064) |
| Eritrea | 36.342(17.980-58.015) | 37.901(17.330-60.405) | 0.090(-0.006, 0.186) |
| Estonia | 57.528(27.285-89.128) | 24.614(11.775-38.335) | -3.235(-3.490, -2.979) |
| Ethiopia | 40.901(19.718-65.768) | 21.253(10.153-33.344) | -2.585(-2.743, -2.427) |
| Federated States of Micronesia | 265.330(117.975-439.526) | 171.769(80.707-274.206) | -1.527(-1.581, -1.473) |
| Fiji | 412.300(188.155-658.933) | 285.032(138.366-435.795) | -1.698(-1.973, -1.421) |
| Finland | 61.005(27.777-98.926) | 53.658(25.344-88.560) | -0.385(-0.432, -0.337) |
| France | 68.238(30.294-115.395) | 48.641(22.368-80.639) | -1.214(-1.356, -1.072) |
| Gabon | 97.439(38.992-166.341) | 71.889(34.421-124.233) | -1.148(-1.273, -1.022) |
| Georgia | 63.841(28.645-98.446) | 22.426(11.676-34.171) | -3.152(-3.653, -2.647) |
| Germany | 93.578(45.212-150.663) | 37.120(17.654-60.601) | -2.643(-2.991, -2.293) |
| Ghana | 40.307(18.638-66.299) | 46.983(20.869-77.375) | 0.616(0.498, 0.733) |
| Greece | 49.404(22.484-81.046) | 41.909(19.229-68.743) | -0.743(-0.862, -0.624) |
| Greenland | 143.685(72.572-225.590) | 80.505(40.403-125.047) | -2.312(-2.460, -2.163) |
| Grenada | 65.331(32.140-102.757) | 72.065(38.044-107.665) | 0.255(0.143, 0.368) |
| Guam | 63.380(33.774-94.497) | 29.844(16.618-43.968) | -2.382(-2.563, -2.200) |
| Guatemala | 82.423(43.189-122.985) | 29.428(15.366-43.385) | -3.902(-4.216, -3.587) |
| Guinea | 74.352(34.874-121.086) | 68.625(31.314-121.851) | -0.033(-0.196, 0.131) |
| Guinea-Bissau | 116.202(51.222-198.547) | 98.527(42.925-175.267) | -0.345(-0.526, -0.164) |
| Guyana | 63.835(30.788-99.119) | 66.774(34.091-102.177) | -0.093(-0.269, 0.084) |
| Haiti | 73.669(34.873-128.180) | 84.206(41.451-155.306) | 0.533(0.459, 0.606) |
| Honduras | 62.516(31.204-97.612) | 46.525(24.152-73.809) | -1.099(-1.180, -1.017) |
| Hungary | 47.528(22.492-75.312) | 28.580(14.110-44.935) | -1.885(-2.023, -1.746) |
| Iceland | 97.203(45.373-157.480) | 66.155(31.274-107.102) | -1.407(-1.493, -1.320) |
| India | 41.273(18.059-69.021) | 51.115(21.102-85.005) | 0.937(0.839, 1.035) |
| Indonesia | 37.484(17.883-58.411) | 46.470(21.424-74.275) | 0.889(0.668, 1.111) |
| Iran | 69.896(31.179-108.575) | 51.551(26.831-77.930) | -1.250(-1.394, -1.105) |
| Iraq | 89.174(42.221-140.133) | 57.829(29.794-88.254) | -1.815(-1.983, -1.647) |
| Ireland | 104.589(48.833-169.286) | 61.573(29.379-100.232) | -1.859(-1.991, -1.727) |
| Israel | 64.416(31.268-102.090) | 32.372(15.192-51.609) | -2.510(-2.771, -2.247) |
| Italy | 51.096(23.169-83.139) | 25.976(12.254-42.513) | -2.531(-2.767, -2.294) |
| Jamaica | 53.624(28.313-82.354) | 58.497(31.017-87.854) | -0.025(-0.318, 0.268) |
| Japan | 44.169(21.589-72.901) | 15.325(7.905-24.696) | -3.964(-4.276, -3.651) |
| Jordan | 77.504(38.026-117.492) | 44.504(22.930-66.674) | -2.274(-2.555, -1.992) |
| Kazakhstan | 76.063(33.516-121.568) | 64.998(30.909-102.872) | -1.376(-1.933, -0.816) |
| Kenya | 37.036(15.475-91.271) | 51.992(20.176-139.862) | 1.372(1.159, 1.585) |
| Kiribati | 283.668(120.128-563.411) | 248.965(114.484-419.279) | -0.527(-0.641, -0.413) |
| Kuwait | 74.322(38.514-110.784) | 46.835(25.465-69.723) | -1.652(-2.032, -1.270) |
| Kyrgyzstan | 65.126(30.866-100.990) | 27.516(13.851-42.197) | -3.683(-4.044, -3.321) |
| Laos | 59.571(26.933-102.731) | 47.230(19.394-83.908) | -0.870(-0.990, -0.749) |
| Latvia | 69.630(32.333-108.706) | 26.151(12.755-41.124) | -3.582(-3.859, -3.304) |
| Lebanon | 66.753(31.252-107.198) | 54.729(28.682-83.122) | -0.649(-0.715, -0.582) |
| Lesotho | 103.214(42.147-204.252) | 160.989(64.472-283.446) | 2.192(1.718, 2.668) |
| Liberia | 101.931(46.614-168.134) | 82.292(38.381-143.104) | -0.745(-0.992, -0.498) |
| Libya | 94.760(43.064-152.480) | 99.897(51.905-151.136) | 0.233(0.123, 0.342) |
| Lithuania | 43.296(20.009-67.478) | 21.338(10.282-33.478) | -2.622(-2.839, -2.405) |
| Luxembourg | 93.230(42.137-153.004) | 59.442(27.365-96.036) | -1.696(-1.834, -1.559) |
| Macedonia | 102.882(48.439-163.179) | 58.517(28.589-91.872) | -2.307(-2.581, -2.033) |
| Madagascar | 62.348(31.405-98.267) | 75.948(33.060-131.027) | 0.479(0.401, 0.558) |
| Malawi | 51.259(28.585-78.595) | 59.059(30.313-96.435) | 0.153(0.005, 0.302) |
| Malaysia | 57.994(26.113-89.553) | 34.051(17.138-51.636) | -2.521(-2.856, -2.185) |
| Maldives | 49.858(21.651-82.371) | 20.140(10.447-30.934) | -3.294(-3.425, -3.163) |
| Mali | 93.365(40.224-154.830) | 82.818(33.651-155.728) | -0.331(-0.520, -0.143) |
| Malta | 67.938(30.231-114.606) | 55.007(25.084-89.673) | -0.894(-0.956, -0.832) |
| Marshall Islands | 227.942(102.535-363.694) | 174.589(77.087-287.172) | -0.931(-1.066, -0.794) |
| Mauritania | 126.827(58.750-205.880) | 80.151(38.510-127.427) | -1.483(-1.721, -1.245) |
| Mauritius | 121.353(55.101-188.314) | 46.791(23.682-69.793) | -3.415(-3.688, -3.140) |
| Mexico | 55.080(29.156-83.082) | 25.696(14.371-38.938) | -2.649(-2.823, -2.475) |
| Moldova | 56.754(26.100-88.112) | 21.278(10.315-33.694) | -3.762(-3.951, -3.573) |
| Monaco | 52.913(23.756-86.435) | 53.804(25.644-88.615) | 0.050(-0.014, 0.114) |
| Mongolia | 70.504(30.218-114.587) | 29.609(14.469-45.689) | -3.575(-3.861, -3.287) |
| Montenegro | 26.615(13.348-42.429) | 31.351(16.353-49.194) | 0.536(0.444, 0.628) |
| Morocco | 82.314(37.201-131.728) | 73.326(33.891-114.347) | -0.407(-0.426, -0.387) |
| Mozambique | 39.206(21.763-60.570) | 51.391(24.121-85.430) | 1.177(1.057, 1.296) |
| Myanmar | 89.188(40.629-148.851) | 64.506(27.678-111.079) | -1.371(-1.528, -1.213) |
| Namibia | 114.899(48.109-214.950) | 112.161(50.977-198.479) | -0.340(-0.675, -0.003) |
| Nauru | 259.134(115.969-404.926) | 209.694(97.297-334.685) | -0.814(-1.238, -0.388) |
| Nepal | 64.028(27.947-115.639) | 66.789(28.123-120.405) | 0.377(0.103, 0.651) |
| Netherlands | 65.939(28.961-109.005) | 51.891(24.125-85.730) | -0.775(-1.064, -0.485) |
| New Zealand | 169.605(80.007-269.458) | 78.541(40.545-122.004) | -2.442(-2.827, -2.055) |
| Nicaragua | 56.737(29.540-85.689) | 37.261(19.746-56.238) | -1.677(-1.798, -1.555) |
| Niger | 67.715(31.034-112.316) | 49.620(21.786-89.984) | -0.970(-1.210, -0.730) |
| Nigeria | 54.357(25.352-84.058) | 57.814(28.470-88.737) | 0.036(-0.013, 0.085) |
| Niue | 140.675(67.783-217.873) | 104.337(55.973-159.299) | -1.502(-1.660, -1.344) |
| North Korea | 27.529(13.659-47.720) | 31.410(15.692-53.327) | 0.427(0.362, 0.493) |
| Northern Mariana Islands | 113.270(55.181-183.763) | 63.730(34.280-90.916) | -2.107(-2.349, -1.864) |
| Norway | 110.235(49.348-177.564) | 46.617(22.113-73.978) | -3.156(-3.307, -3.004) |
| Oman | 65.740(30.375-107.692) | 61.630(31.921-91.694) | 0.048(-0.085, 0.180) |
| Pakistan | 49.071(21.198-89.729) | 55.987(23.176-110.908) | 0.305(0.003, 0.609) |
| Palau | 227.056(111.941-353.345) | 175.740(89.532-262.191) | -0.724(-0.801, -0.647) |
| Palestine | 84.012(38.525-132.354) | 59.389(30.805-87.623) | -1.258(-1.439, -1.078) |
| Panama | 41.795(22.840-64.021) | 33.183(17.761-50.988) | -1.023(-1.163, -0.883) |
| Papua New Guinea | 163.160(69.226-286.085) | 158.359(68.046-305.655) | -0.102(-0.165, -0.039) |
| Paraguay | 33.193(17.976-50.562) | 42.598(23.134-65.474) | 0.908(0.872, 0.945) |
| Peru | 45.769(26.979-69.666) | 34.066(18.958-54.346) | -1.031(-1.229, -0.834) |
| Philippines | 62.297(29.289-95.387) | 65.959(31.018-101.845) | 0.278(0.082, 0.474) |
| Poland | 135.582(61.816-219.963) | 66.876(33.215-103.831) | -2.451(-2.950, -1.950) |
| Portugal | 108.291(47.405-177.015) | 80.575(37.154-132.453) | -0.776(-1.081, -0.470) |
| Puerto Rico | 124.460(64.931-192.281) | 103.092(56.555-160.488) | -1.120(-1.292, -0.948) |
| Qatar | 86.290(41.284-131.709) | 52.285(27.613-76.958) | -2.114(-2.506, -1.720) |
| Romania | 60.287(26.814-94.845) | 34.148(16.222-54.055) | -1.834(-1.940, -1.728) |
| Russian Federation | 71.088(33.414-109.500) | 21.301(10.712-33.225) | -4.754(-5.018, -4.490) |
| Rwanda | 92.542(48.503-146.447) | 66.495(34.744-113.912) | -1.916(-2.218, -1.613) |
| Saint Kitts and Nevis | 55.633(28.937-84.496) | 50.555(28.493-75.935) | -0.384(-0.487, -0.281) |
| Saint Lucia | 77.564(38.026-121.689) | 67.331(34.856-103.053) | -0.750(-0.893, -0.606) |
| Saint Vincent and the Grenadines | 43.422(21.582-67.975) | 49.115(25.862-75.517) | 0.264(0.085, 0.444) |
| Samoa | 206.630(92.926-383.401) | 149.200(76.608-235.996) | -1.014(-1.088, -0.940) |
| San Marino | 49.888(22.631-81.829) | 52.334(24.609-84.839) | 0.285(0.236, 0.333) |
| Sao Tome and Principe | 161.370(74.870-265.393) | 150.478(69.887-251.246) | -0.452(-0.656, -0.247) |
| Saudi Arabia | 103.730(49.229-165.492) | 85.744(44.629-130.232) | -0.698(-0.812, -0.583) |
| Senegal | 76.936(35.094-127.064) | 60.110(28.292-99.832) | -0.552(-0.924, -0.179) |
| Serbia | 53.644(25.311-83.523) | 35.756(18.226-54.819) | -1.798(-1.994, -1.602) |
| Seychelles | 60.420(27.246-91.975) | 47.515(23.629-71.379) | -0.802(-0.906, -0.699) |
| Sierra Leone | 66.396(31.507-109.677) | 62.822(28.081-109.183) | 0.048(-0.137, 0.233) |
| Singapore | 42.254(19.400-67.814) | 19.731(9.154-32.153) | -2.960(-3.311, -2.607) |
| Slovakia | 32.428(15.859-50.497) | 23.010(11.109-36.737) | -1.223(-1.328, -1.117) |
| Slovenia | 69.828(33.157-110.559) | 44.277(21.378-70.267) | -1.652(-1.805, -1.498) |
| Solomon Islands | 115.777(51.374-200.976) | 109.759(49.338-188.321) | -0.131(-0.190, -0.072) |
| Somalia | 72.222(33.316-121.207) | 73.858(34.258-125.556) | -0.039(-0.144, 0.066) |
| South Africa | 126.402(57.776-200.630) | 101.165(48.044-149.187) | -0.923(-1.491, -0.352) |
| South Korea | 71.525(31.695-114.377) | 19.241(9.679-30.376) | -4.986(-5.278, -4.694) |
| South Sudan | 44.103(23.785-70.320) | 41.744(21.736-71.818) | -0.352(-0.726, 0.023) |
| Spain | 50.111(23.845-82.605) | 40.002(18.719-63.869) | -0.629(-0.819, -0.438) |
| Sri Lanka | 64.178(27.920-101.321) | 41.942(18.224-69.650) | -1.618(-1.791, -1.445) |
| Sudan | 134.532(49.175-297.027) | 89.646(40.848-156.547) | -1.588(-1.688, -1.487) |
| Suriname | 39.236(19.169-61.897) | 40.859(21.119-61.680) | -0.108(-0.225, 0.010) |
| Swaziland | 208.980(88.932-374.342) | 219.029(104.041-365.388) | 0.425(-0.114, 0.967) |
| Sweden | 107.893(47.217-180.712) | 58.993(26.845-97.170) | -1.924(-2.382, -1.465) |
| Switzerland | 66.032(30.529-105.278) | 39.456(18.213-64.757) | -1.785(-1.923, -1.647) |
| Syria | 106.950(50.873-166.443) | 112.612(61.621-167.679) | 0.030(-0.138, 0.199) |
| Taiwan | 55.388(25.766-86.045) | 39.693(20.401-62.574) | -1.148(-1.501, -0.794) |
| Tajikistan | 83.252(37.006-135.925) | 48.310(22.270-77.525) | -2.063(-2.275, -1.851) |
| Tanzania | 51.615(24.572-80.847) | 62.694(28.908-104.104) | 0.531(0.484, 0.579) |
| Thailand | 36.741(16.815-56.379) | 32.077(16.283-49.564) | -0.885(-1.075, -0.695) |
| The Bahamas | 57.206(29.529-86.854) | 61.580(34.218-91.840) | 0.020(-0.094, 0.133) |
| The Gambia | 82.109(35.998-137.289) | 78.899(34.604-145.588) | -0.198(-0.438, 0.042) |
| Timor-Leste | 28.538(14.331-47.736) | 29.997(14.192-47.886) | 0.126(-0.125, 0.378) |
| Togo | 74.838(35.579-126.930) | 75.527(34.004-134.683) | 0.202(0.061, 0.344) |
| Tokelau | 155.532(65.478-274.298) | 108.635(56.404-166.901) | -1.594(-1.738, -1.451) |
| Tonga | 154.427(76.806-240.009) | 128.254(68.401-190.977) | -0.566(-0.673, -0.458) |
| Trinidad and Tobago | 60.337(30.763-92.262) | 45.844(24.539-68.743) | -1.158(-1.477, -0.839) |
| Tunisia | 68.025(31.330-103.936) | 61.359(30.639-94.276) | -0.574(-0.646, -0.503) |
| Turkey | 86.943(42.350-135.374) | 63.520(32.737-95.276) | -1.343(-1.542, -1.143) |
| Turkmenistan | 70.955(31.249-113.695) | 22.044(11.104-34.934) | -4.471(-4.874, -4.066) |
| Tuvalu | 229.759(103.985-369.012) | 138.903(63.805-222.567) | -1.655(-1.713, -1.596) |
| Uganda | 49.176(24.701-81.215) | 52.077(25.703-97.503) | -0.323(-0.508, -0.138) |
| Ukraine | 35.003(15.639-56.484) | 18.441(9.009-29.408) | -2.732(-2.941, -2.522) |
| United Arab Emirates | 180.756(85.797-284.240) | 153.304(78.694-233.418) | -0.189(-0.427, 0.048) |
| United Kingdom | 137.961(63.898-225.345) | 94.568(44.556-151.592) | -1.245(-1.441, -1.049) |
| United States | 83.538(41.597-128.820) | 104.264(51.312-160.035) | 1.353(1.029, 1.677) |
| Uruguay | 71.677(35.101-112.894) | 55.505(27.980-85.785) | -1.010(-1.070, -0.950) |
| Uzbekistan | 138.501(65.009-220.169) | 58.125(27.994-91.912) | -3.869(-4.467, -3.266) |
| Vanuatu | 153.527(60.691-330.477) | 143.710(59.002-293.899) | -0.464(-0.575, -0.352) |
| Venezuela | 50.799(27.672-76.727) | 40.908(22.136-63.287) | -1.025(-1.269, -0.780) |
| Vietnam | 16.461(7.550-27.614) | 18.899(8.963-30.665) | 0.681(0.530, 0.833) |
| Virgin Islands, U.S. | 86.429(46.845-128.802) | 75.615(42.500-113.656) | -0.419(-0.451, -0.387) |
| Yemen | 99.090(40.656-172.766) | 91.543(38.574-150.355) | -0.498(-0.660, -0.336) |
| Zambia | 47.500(25.288-72.400) | 57.411(27.544-99.127) | 0.389(0.229, 0.550) |
| Zimbabwe | 67.196(28.942-108.849) | 139.949(56.985-237.097) | 3.013(2.533, 3.496) |
